# Supplementary material for: Sex specific expression and distribution of small RNAs in papaya
Source: PubMed Central journal article supplement (PMC3916515; doi:10.1186/1471-2164-15-20), 2014-01-13
Supplement: 12864_2013_7000_MOESM1_ESM.pdf [file 12864_2013_7000_MOESM1_ESM.pdf]

**Supplemental table S1:** Summary of the sRNA reads mapped to the papaya sex chromosomes

| Library          | Total reads | % Unique reads | HSY                            |           | MSY                            |           | X                              |           |
|------------------|-------------|----------------|--------------------------------|-----------|--------------------------------|-----------|--------------------------------|-----------|
|                  |             |                | Number of unique reads aligned | % Aligned | Number of unique reads aligned | % Aligned | Number of unique reads aligned | % Aligned |
| Male             | 1589618     | 42.6           | 26312                          | 3.66      | 35467                          | 5.23      | 26476                          | 3.91      |
| Female           | 3625411     | 43.4           | 49870                          | 3.17      | 68226                          | 4.34      | 56171                          | 3.57      |
| Hermaphrodite    | 1757638     | 41.8           | 28152                          | 3.83      | 38354                          | 5.22      | 29106                          | 3.96      |
| All sex combined | 6972667     | 38.4           |                                |           |                                |           |                                |           |

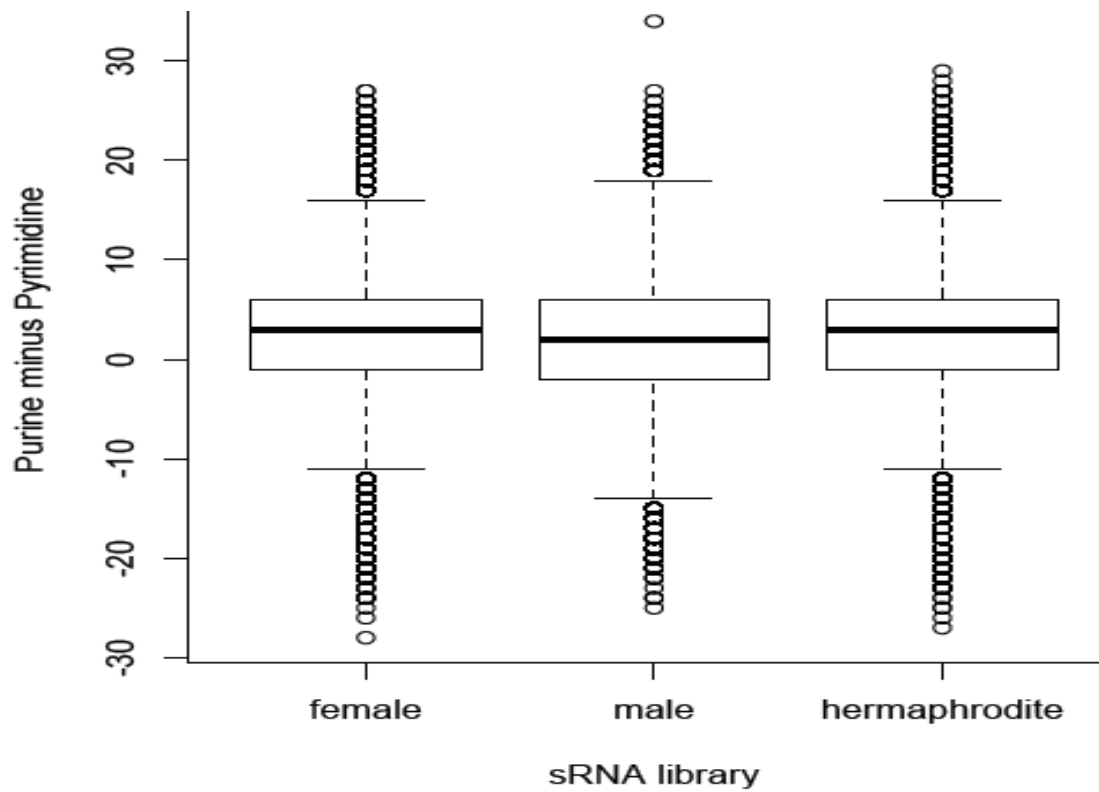

**Figure S1. Distribution of purine-rich and pyrimidine-rich sequences in the sRNA libraries.** The Y- axis shows the value of purine minus pyrimidine: sequences above zero are purine-rich and sequences below zero are pyrimidine-rich.

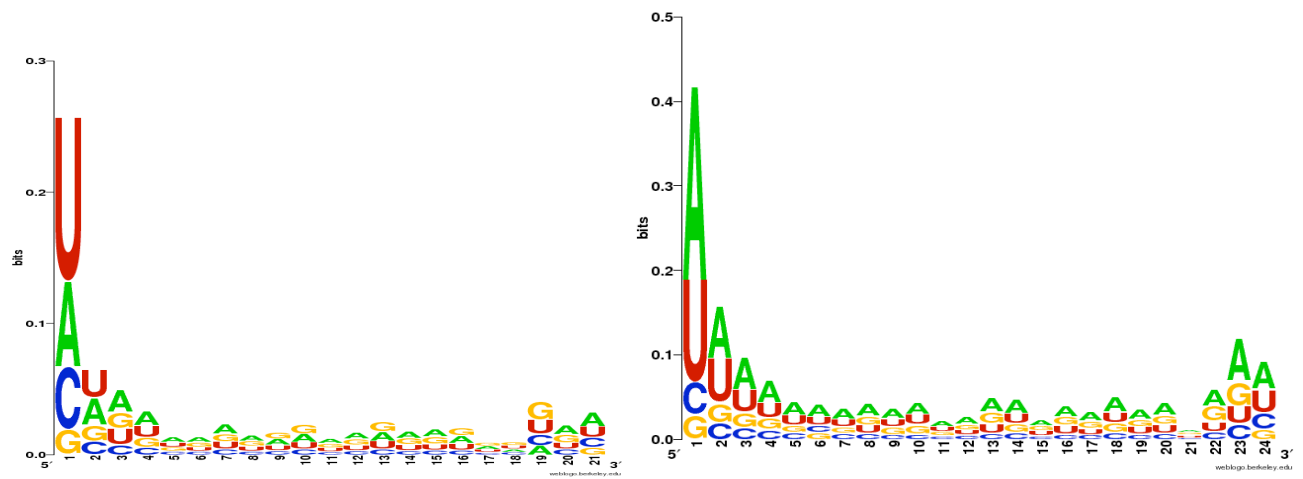

**Figure S2. Frequency of different nucleotides en each position of 21 and 24nt sequences.** Height of each column represents the total conservation and height of each letter represents relative conservation. The letter on the top represents most frequent nucleotide at that position while letter at the bottom represents least frequent nucleotide.
